# Supplementary material for: Ceria Nanoparticles Alleviated Osteoarthritis through Attenuating Senescence and Senescence-Associated Secretory Phenotype in Synoviocytes
Source: MDPI journal article supplement (doi:10.3390/ijms24055056), 2023-03-06
Supplement: s1 [file s1]

## Supplementary material

**Table S1.** Primer sequences used in this study.

| Gene name      | F/R | Sequences 5'-3'         |
|----------------|-----|-------------------------|
| $\beta$ -actin | F   | TGCTATGTTGCCCTAGACTTCG  |
|                | R   | GTTGGCATAGAGGTCTTTACGG  |
| p16            | F   | GAGGACCCCACCACCCTCTC    |
|                | R   | ATACCGCAAATACCGCACGA    |
| p21            | F   | AGCAGTTGAGCCGCGATTG     |
|                | R   | ACCCAGGGCTCAGGTAGATCTTG |
| TNF $\alpha$   | F   | TCCAGAACTCCAGGCGGT      |
|                | R   | TTGGTGGTTTGCTACGAC      |
| IL-6           | F   | AAATCTGCTCTGGTCTTC      |
|                | R   | AGGGTTTCAGTATTGCTC      |
| MMP3           | F   | CATGAACTTGGCCACTCCCT    |
|                | R   | TGGGTACCACGAGGACATCA    |
| ADAMTS5        | F   | ACAAGAGTCTGGAGGTGAGCAAG |
|                | R   | ACATATGGTCCCAACGTCTGC   |
| iNOS           | F   | CAGGCTGGAAGCCGTAACAA    |
|                | R   | CGATGCACAACCTGGGTGAAC   |
| COX2           | F   | GTTCCAACCCATGTCAAAACCGT |
|                | R   | GGCCCTGGTGTAGTAGGAGAGGT |
